# Supplementary material
Source: PubMed Central journal article supplement (PMC5482580)
Supplement: jcsm.13.7.889s1.pdf [file jcsm.13.7.889s1.pdf]

## Poll Questionnaire Sleep and Delayed School Start Times

| Item Number | Sleep Module Questions                                                   | Responses                                                                                                                                                                      |
|-------------|--------------------------------------------------------------------------|--------------------------------------------------------------------------------------------------------------------------------------------------------------------------------|
| 1           | On average, how many hours of sleep does your teen get on school nights? | Under 5 hours<br>5 hours<br>5.5 hours<br>6 hours<br>6.5 hours<br>7 hours<br>7.5 hours<br>8 hours<br>8.5 hours<br>9 hours<br>Over 9 hours                                       |
| 2           | Does your teen adhere to a scheduled time for bed on school nights?      | Yes<br>No                                                                                                                                                                      |
| 3           | How often would you say your teen gets enough sleep on school nights?    | Every night or almost every night<br>A few nights a week<br>A few nights a month<br>Rarely<br>Never                                                                            |
| 4           | What time does your teen school begin?                                   | Before 7:00 am<br>7:00 – 7:29 am<br>7:30 – 7:59 am<br>8:00 – 8:29 am<br>8:30 am or later                                                                                       |
| 5           | My teen’s school start time is:                                          | Too early<br>Too later<br>About right                                                                                                                                          |
| 6           | What time does your teen usually go to bed in school nights?             | Before 9:00 pm<br>9:00 – 9:29 pm<br>9:30 – 9:59 pm<br>10:00 – 10:29 pm<br>10:30 – 10:59 pm<br>11:00 – 11:29 pm<br>11:30 – 11:59 pm<br>12 midnight or later<br>No usual bedtime |
| 7           | What time does your teen leave home to go to school?                     | Before 6:29 am<br>6:30 – 7:00 am<br>7:00 – 7:29 am<br>7:30 – 7:59 am<br>8:00 – 8:29 am<br>8:30 am or later                                                                     |

| Item Number | Sleep Module Questions                                                                                                                                                                                                                                                                                                                                                                                                                                                                 | Responses                                                                                                                                                                             |
|-------------|----------------------------------------------------------------------------------------------------------------------------------------------------------------------------------------------------------------------------------------------------------------------------------------------------------------------------------------------------------------------------------------------------------------------------------------------------------------------------------------|---------------------------------------------------------------------------------------------------------------------------------------------------------------------------------------|
| 8           | On most days how does your teen get to school?                                                                                                                                                                                                                                                                                                                                                                                                                                         | Drives himself / herself<br>Rides with another student that drives<br>Drives himself / herself<br>Rides with an adult<br>Walks / rides bike<br>Uses bus / other public transportation |
| 9           | Would you support a change in your teen's school's start time to 8:30 or later?                                                                                                                                                                                                                                                                                                                                                                                                        | Yes, regardless of impact on the school budget<br>Yes, only if it did not impact the school budget<br>No                                                                              |
| 10          | Has there been any discussion at your teen's school about changing to a later start time?                                                                                                                                                                                                                                                                                                                                                                                              | Yes<br>No<br>Unsure                                                                                                                                                                   |
| 11          | Having a later school start time of 8:30 or later would impact my teen's: <ol style="list-style-type: none"> <li>1. Allowing him / her to get more sleep</li> <li>2. Improving school performance</li> <li>3. Improving health</li> <li>4. Not having time for after-school activities</li> <li>5. Decreasing stress</li> <li>6. Reducing his/her ability to have a job</li> <li>7. Interfering with meal times</li> <li>8. Altering transportation plans in a negative way</li> </ol> | Very likely<br>Somewhat likely<br>Not likely                                                                                                                                          |
| 12          | In the past, has your teen's doctor talked with you or your teen about the optimal amount of sleep for your teen?                                                                                                                                                                                                                                                                                                                                                                      | Yes<br>No<br>Unsure                                                                                                                                                                   |
| 13          | The American Academy of Pediatrics (AAP) recently recommended that schools delay start times until 8:30 am or later for teens.<br><br>Have you previously heard or read about these new AAP guidelines?                                                                                                                                                                                                                                                                                | Yes<br>No                                                                                                                                                                             |
| 14          | The AAP urges high schools and middle schools to aim for start times (8:30 am or later) which allow students to get 8.5-9.5 hours of sleep to improve physical and mental health, safety (by preventing drowsy driving crashes), academic performance and quality of life.<br><br>Please rate your level of agreement with the new AAP guidelines.                                                                                                                                     | Strongly agree<br>Agree<br>Disagree<br>Strongly disagree                                                                                                                              |
